# Supplementary material for: Exploring NMR methods as a tool to select suitable fluorescent nucleotide analogues
Source: Royal Society of Chemistry journal article supplement (doi:10.1039/c3ob40159f), 2013-01-01
Supplement: c3ob40159f.pdf [file c3ob40159f.pdf]

## Supplementary Material

### Exploring NMR methods as a tool to select suitable fluorescent nucleotide analogues

Patrick Groves,<sup>\*a,b</sup> Agnieszka Strzelecka-Kiliszek,<sup>c</sup> Anna Sekrecka-Belniak,<sup>c,d</sup> Angeles Canales,<sup>b,e</sup> Jesús Jiménez-Barbero,<sup>b</sup> Joanna Bandorowicz-Pikula,<sup>c</sup> Sławomir Pikula,<sup>c</sup> and F. Javier Cañada<sup>b</sup>

#### Supplementary Material

Figure S1. Tr-NOE buildup curves for TNP-GTP binding to AnxA6

Figure S2. Tr-NOE buildup curves for MANT-GTP binding to AnxA6

Figure S3. Tr-NOE buildup curves for BODIPY- $\gamma$ S-GTP binding to AnxA6

Fig. S1. Tr-NOE buildup curves for TNP-GTP binding to AnxA6.

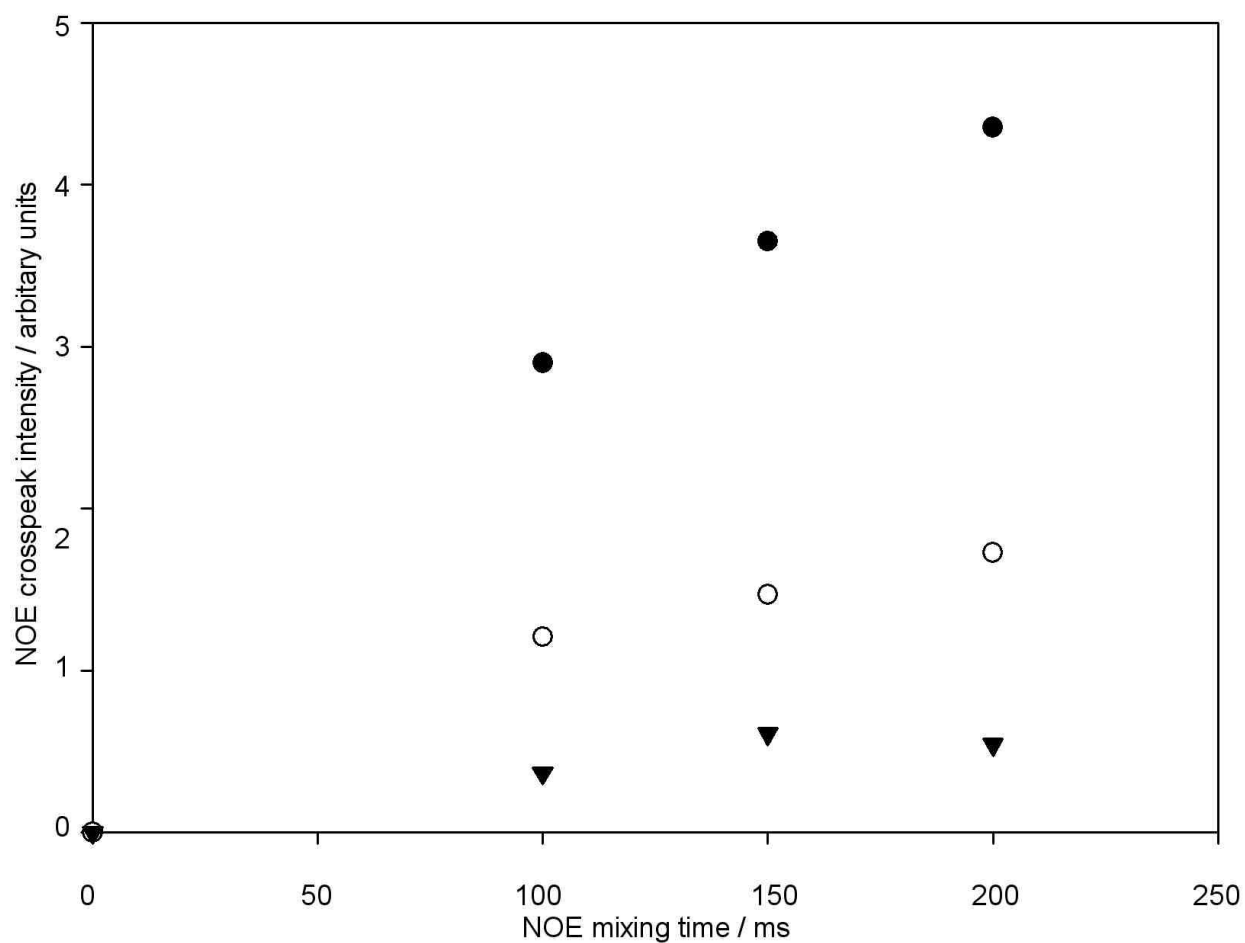

Fig. S1. Tr-NOE buildup curves for TNP-GTP binding to AnxA6. The volume of NOE peaks involving proton H8 of the nucleotide base is plotted as a function of mixing time employed in a series of Tr-NOESY experiments. The H8-H1' NOE is represented as filled circles, the H8-H2' NOE is represented by an open circle, the H8-H3' NOE is represented by filled triangles.

Fig. S2. Tr-NOE buildup curves for MANT-GTP binding to AnxA6

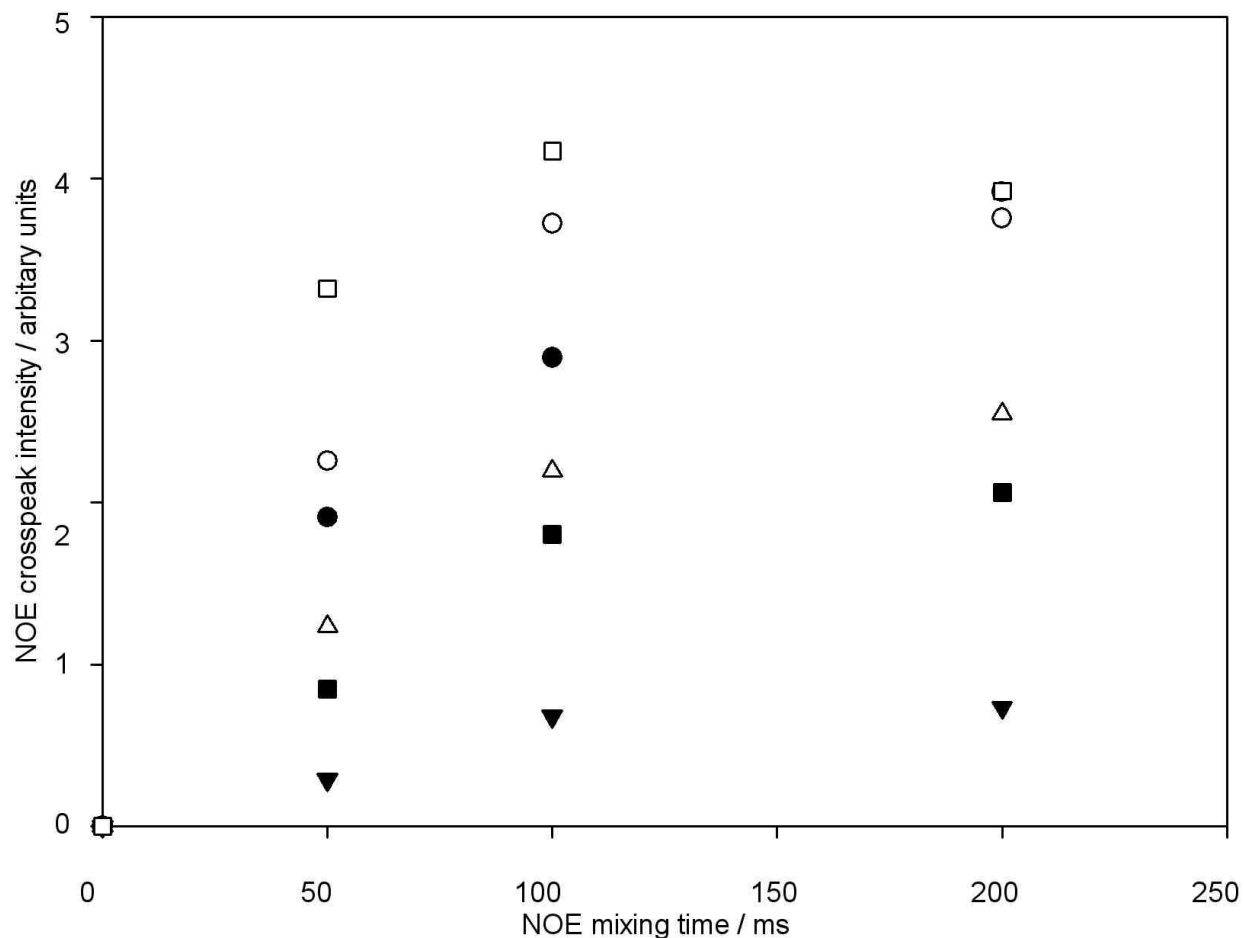

Fig. S2. Tr-NOE buildup curves for MANT-GTP binding to AnxA6. The volume of NOE peaks involving proton H8 of the nucleotide base is plotted as a function of mixing time employed in a series of Tr-NOESY experiments. The H8-H1' NOE is represented as filled circles, the H8-H2' NOE is represented by an open circle, the H8-H3' NOE is represented by filled triangles for the O2-MANT isoform. The H8-H1' NOE is represented as open triangles, the H8-H2' NOE is represented by filled squares, the H8-H3' NOE is represented by open squares for the O3-MANT isoform

Fig. S3. Tr-NOE buildup curves for BODIPY- $\gamma$ S-GTP binding to AnxA6.

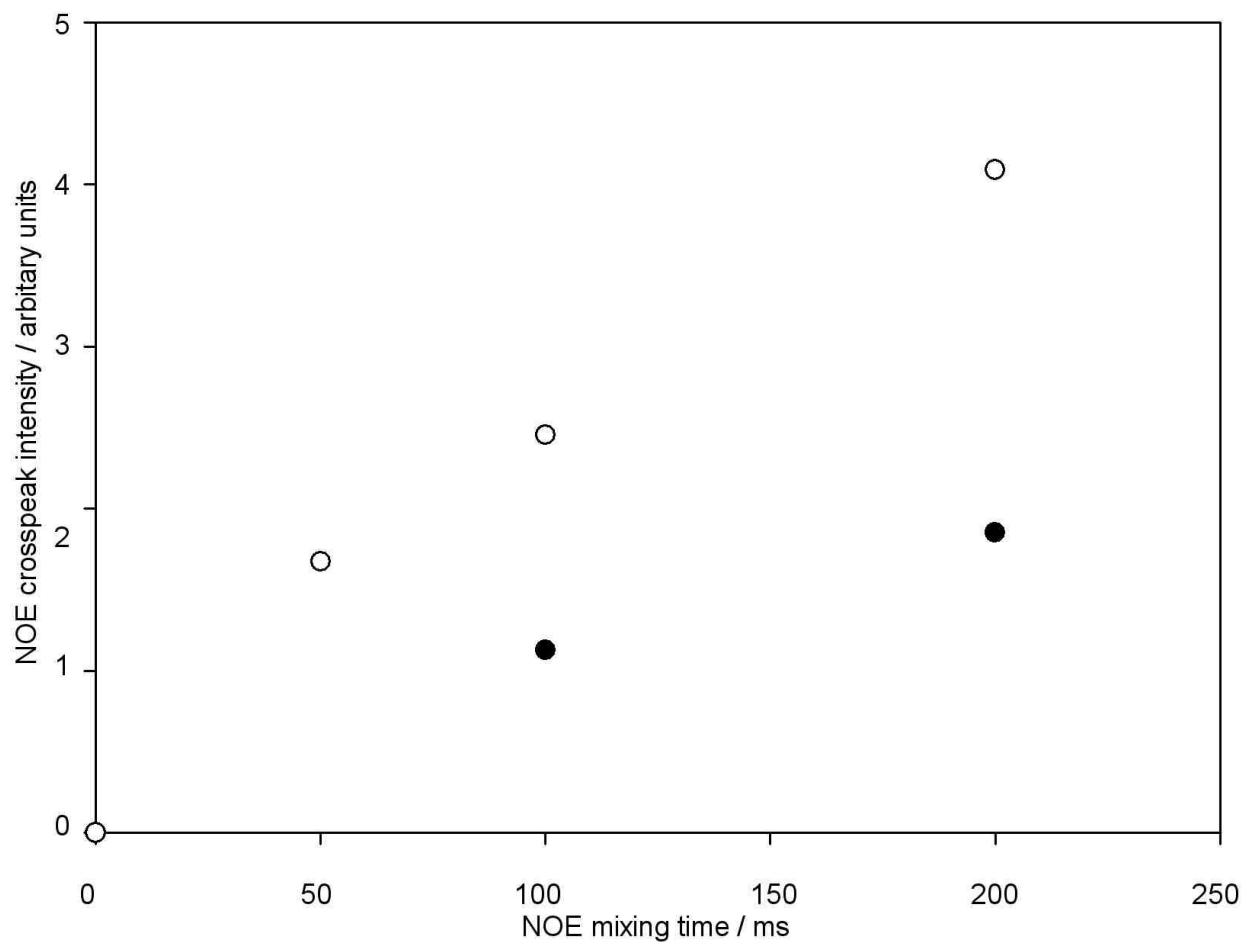

Fig. S3. Tr-NOE buildup curves for BODIPY- $\gamma$ S-GTP binding to AnxA6. The volume of NOE peaks involving proton H8 of the nucleotide base is plotted as a function of mixing time employed in a series of Tr-NOESY experiments. The H8-H1' NOE is represented as filled circles, the H8-H2' NOE is represented by an open circle, the H8-H3' NOEs were not observed.
